# Supplementary material for: Association of ambulatory blood pressure monitoring with renal outcome in patients with chronic kidney disease
Source: PubMed Central journal article supplement — Kidney Res Clin Pract. 2020 Mar 31;39(1):70–80. doi: 10.23876/j.krcp.19.103 (PMC7105625; doi:10.23876/j.krcp.19.103), 2020-03-31
Supplement: KRCP-39-070_Supple.pdf [file KRCP-39-070_Supple.pdf]

**Supplementary Table 1.** The test statistics and related degrees of freedom of Table 1

|                                                  | T       | df  | P     | 95% CI  |         |
|--------------------------------------------------|---------|-----|-------|---------|---------|
|                                                  |         |     |       | Lower   | Upper   |
| Age (y)                                          | -0.198  | 385 | 0.843 | -3.622  | 2.958   |
| Sex, male                                        | -1.541  | 96  | 0.127 | -0.228  | 0.029   |
| The duration of CKD (mo)                         | 1.364   | 370 | 0.173 | -6.624  | 36.605  |
| Diabetes mellitus                                | -6.13   | 384 | 0.000 | -0.504  | -0.259  |
| Body mass index (kg/m <sup>2</sup> )             | 0.529   | 381 | 0.597 | -0.741  | 1.286   |
| The cause of CKD                                 | 3.791   | 385 | 0.000 | 0.276   | 0.872   |
| The stage of CKD                                 | -10.792 | 131 | 0.000 | -1.453  | -1.009  |
| The number of hypertension medication            | -3.667  | 385 | 0.000 | -0.812  | -0.245  |
| The use of ACEi/ARB                              | 2.055   | 86  | 0.043 | 0.004   | 0.257   |
| The use of BB                                    | -2.2    | 89  | 0.030 | -0.279  | -0.014  |
| The use of CCB                                   | -1.775  | 98  | 0.079 | -0.235  | 0.031   |
| The use of diuretics                             | -3.583  | 82  | 0.001 | -0.360  | -0.103  |
| Serum albumin (g/dL)                             | 6.609   | 80  | 0.000 | 0.268   | 0.499   |
| Serum BUN (mg/dL)                                | -8.011  | 81  | 0.000 | -18.154 | -10.931 |
| Serum Cr (mg/dL)                                 | -10.455 | 82  | 0.000 | -1.298  | -0.883  |
| Serum GFR (mL/min/1.73 m <sup>2</sup> )          | 11.89   | 157 | 0.000 | 20.450  | 28.598  |
| Serum Hb (g/dL)                                  | 6.156   | 384 | 0.000 | 1.107   | 2.147   |
| Serum HbA1c (%)                                  | -4.758  | 228 | 0.000 | -1.416  | -0.586  |
| Serum total-C (mg/dL)                            | 0.568   | 385 | 0.571 | -8.078  | 14.638  |
| Serum Ca × P (mg <sup>2</sup> /dL <sup>2</sup> ) | -2.146  | 87  | 0.035 | -3.529  | -0.135  |
| Serum TG (mg/dL)                                 | -1.291  | 78  | 0.201 | -53.995 | 11.521  |
| Urine protein-creatinine ratio (g/g creatinine)  | -6.028  | 70  | 0.000 | -3.556  | -1.788  |
| BP pattern                                       | -2.91   | 112 | 0.004 | -0.596  | -0.113  |
| Daytime-nighttime BP ratio                       | -0.495  | 385 | 0.621 | -0.165  | 0.099   |

ACEi, angiotensin-converting enzyme inhibitor; ARB, angiotensin receptor blocker; BB, beta blocker; BP, blood pressure; BUN, blood urea nitrogen; Ca × P, product of calcium and phosphorous; CCB, calcium channel blocker; CI, confidence interval; CKD, chronic kidney disease; Cr, creatinine; GFR, glomerular filtration rate; Hb, hemoglobin; HbA1c, hemoglobin A1c; TG, triglycerides; total-C, total cholesterol.

**Supplementary Table 2.** The test statistics and related degrees of freedom of Table 2

|                | t      | df  | P     | 95% CI  |        |
|----------------|--------|-----|-------|---------|--------|
|                |        |     |       | Lower   | Upper  |
| Mean ASBP      | -6.197 | 385 | 0.000 | -17.800 | -9.225 |
| Mean ADBP      | -2.401 | 385 | 0.017 | -6.104  | -0.607 |
| Daytime ASBP   | -5.970 | 385 | 0.000 | -17.800 | -8.981 |
| Daytime ADBP   | -2.004 | 385 | 0.046 | -5.790  | -0.056 |
| Nighttime ASBP | -6.024 | 385 | 0.000 | -19.187 | -9.744 |
| Nighttime ADBP | -3.008 | 385 | 0.003 | -7.566  | -1.585 |
| OSBP           | -3.176 | 385 | 0.002 | -12.202 | -2.871 |
| ODBP           | 0.961  | 83  | 0.339 | -1.743  | 5.002  |

ADBP, ambulatory diastolic blood pressure; ASBP, ambulatory systolic blood pressure; CI, confidence interval; ODBP, office diastolic blood pressure; OSBP, office systolic blood pressure.

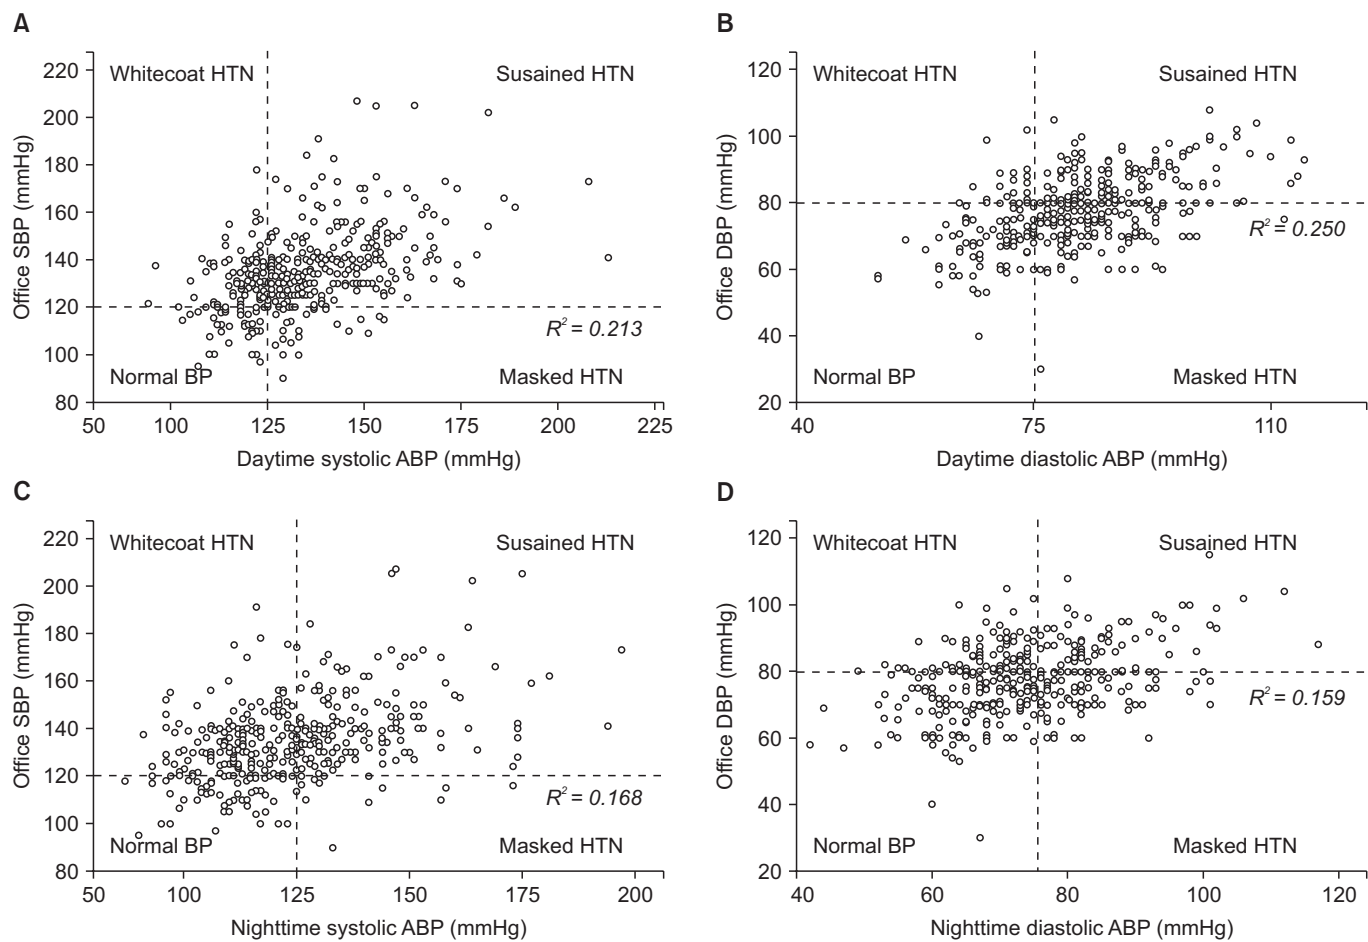

**Supplementary Figure 1.** Relationship between office blood pressure (BP) and daytime ambulatory BP (ABP) in systolic (A), diastolic (B) phase, nighttime ambulatory blood pressure in systolic (C) and diastolic (D) phase. HTN, hypertension; SBP, systolic BP.

**Supplementary Table 3. Association between 40% decline of eGFR and blood pressure by chi-square test**

| Group                                         | 40% decline of eGFR |    |       |
|-----------------------------------------------|---------------------|----|-------|
|                                               | $\chi^2$            | df | P     |
| Mean ambulatory blood pressure                | 2.004               | 3  | 0.572 |
| Mean ambulatory systolic blood pressure       | 1.827               | 3  | 0.609 |
| Mean ambulatory diastolic blood pressure      | 3.525               | 2  | 0.172 |
| Daytime ambulatory blood pressure             | 5.229               | 3  | 0.156 |
| Daytime ambulatory systolic blood pressure    | 3.708               | 3  | 0.295 |
| Daytime ambulatory diastolic blood pressure   | 8.200               | 2  | 0.017 |
| Nighttime ambulatory blood pressure           | 4.173               | 3  | 0.243 |
| Nighttime ambulatory systolic blood pressure  | 1.957               | 3  | 0.581 |
| Nighttime ambulatory diastolic blood pressure | 4.401               | 2  | 0.111 |
| Office blood pressure                         | 2.530               | 3  | 0.470 |
| Office systolic blood pressure                | 1.560               | 3  | 0.668 |
| Office diastolic blood pressure               | 1.515               | 2  | 0.469 |

eGFR, estimated glomerular filtration rate.
